# Supplementary material for: Complementing 16S rRNA Gene Amplicon Sequencing with Total Bacterial Load To Infer Absolute Species Concentrations in the Vaginal Microbiome
Source: PubMed Central journal article supplement (PMC7141891; doi:10.1128/msystems.00777-19), 2020-04-07

## Participant 01

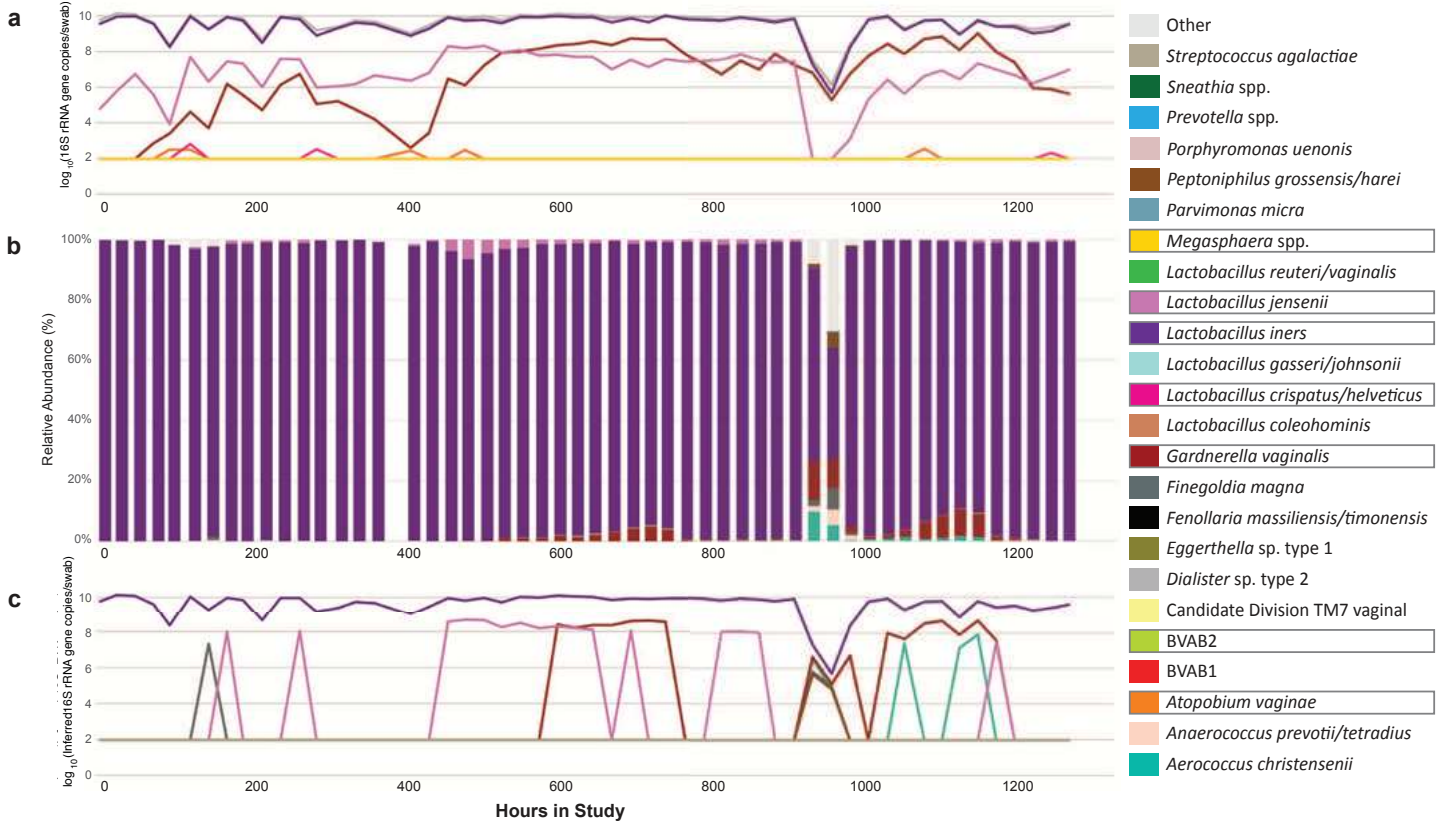

## Participant 02

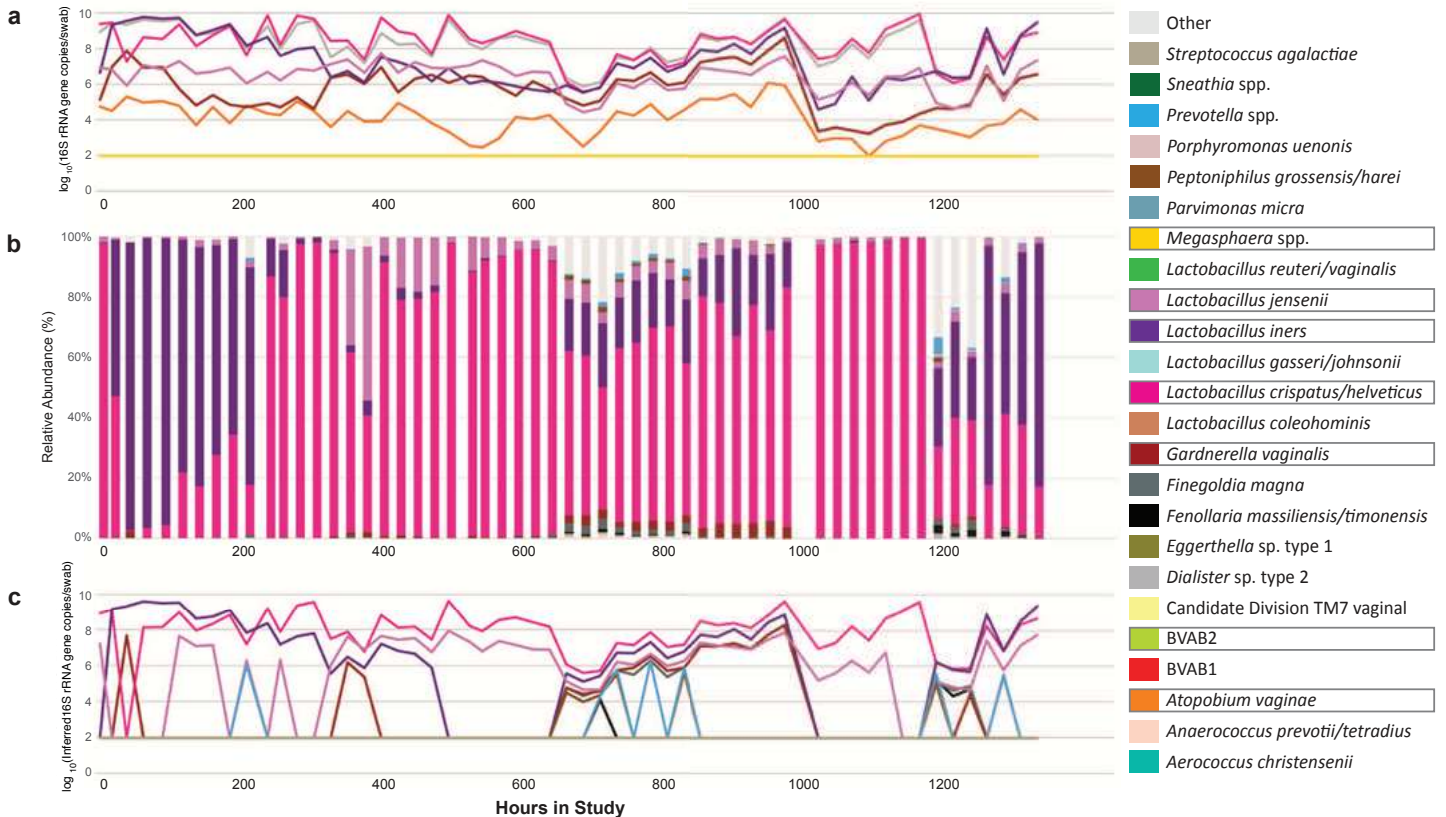

## Participant 03

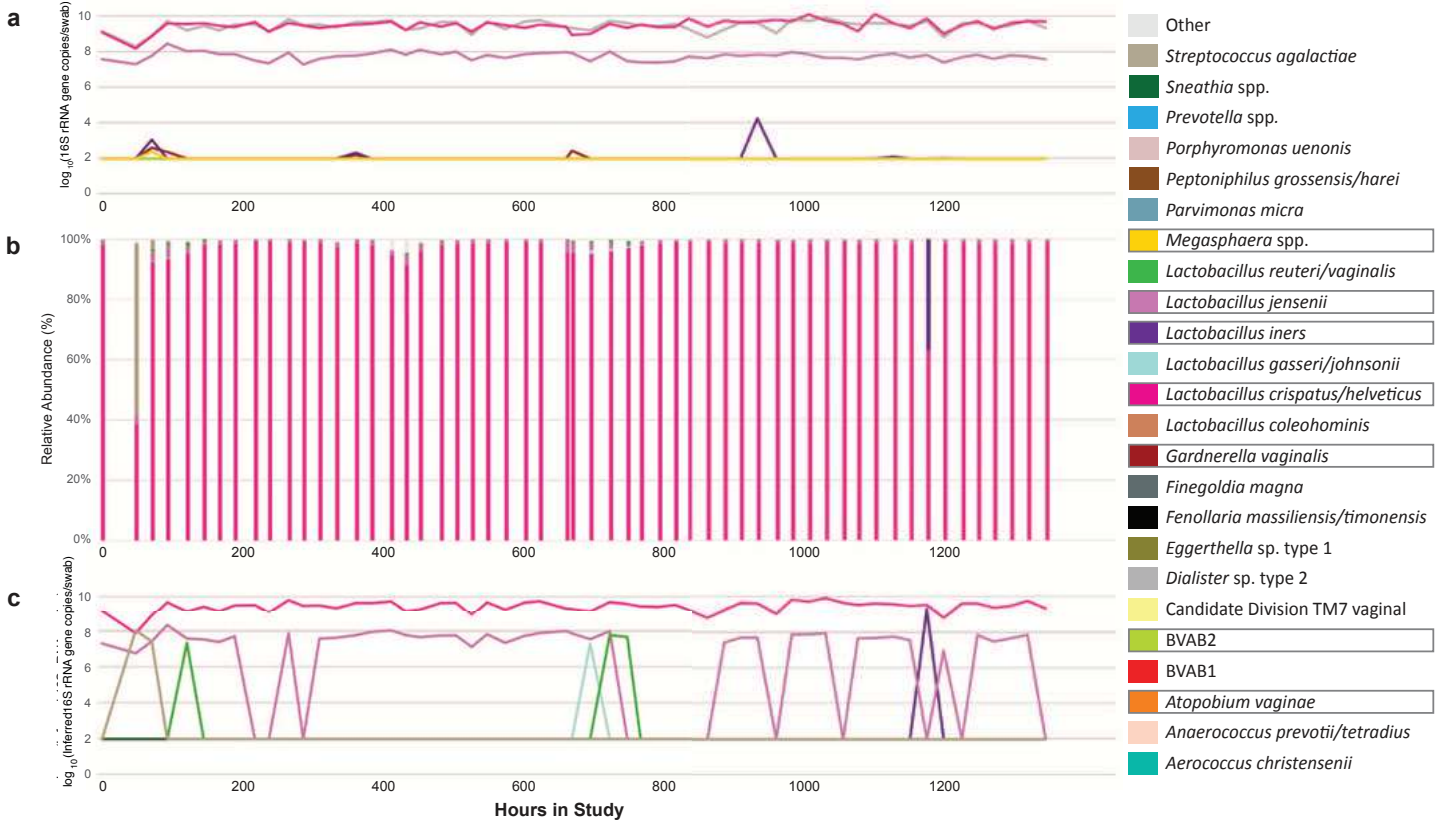

## Participant 04

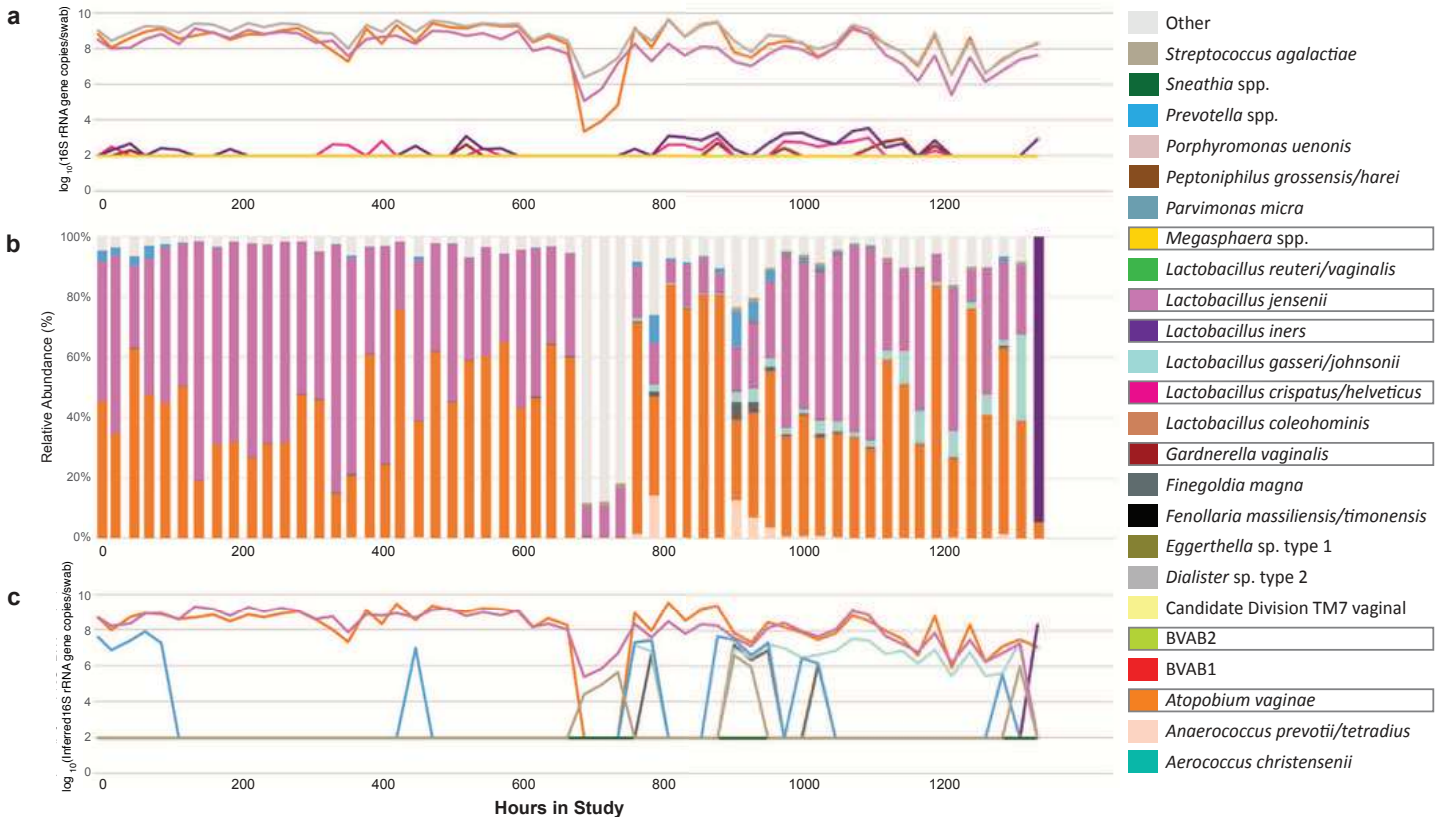

## Participant 05

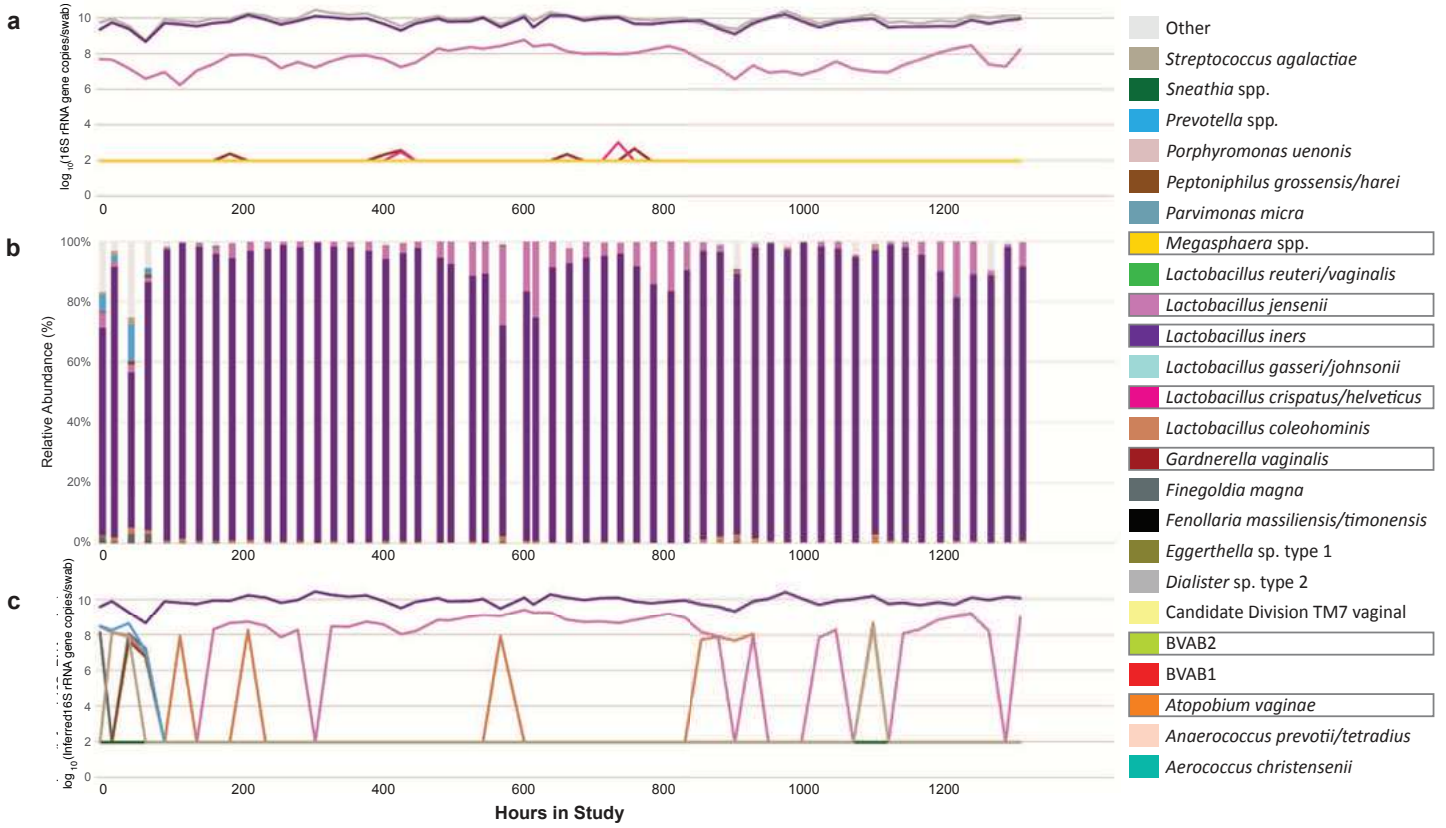

## Participant 06

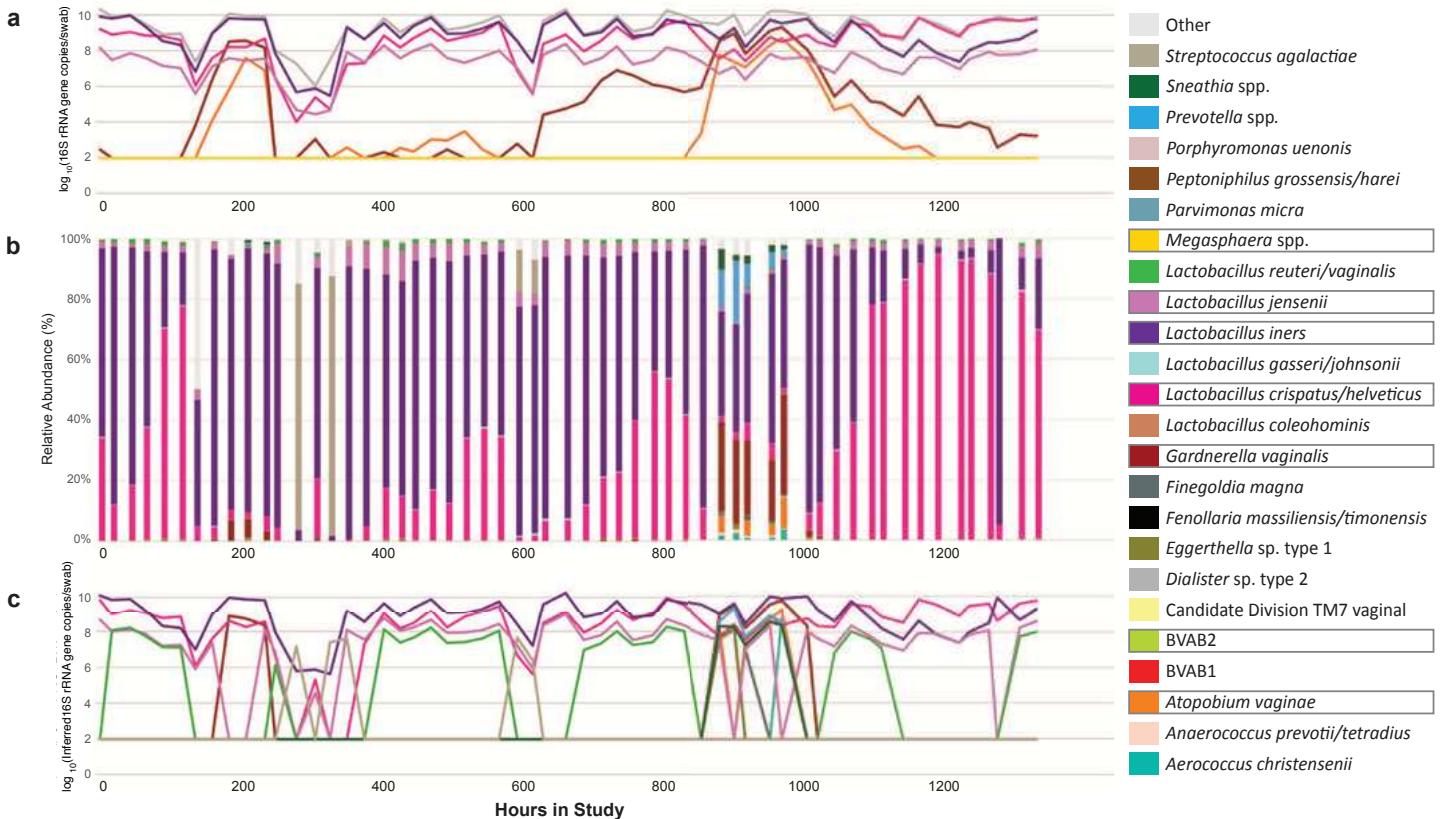

## Participant 07

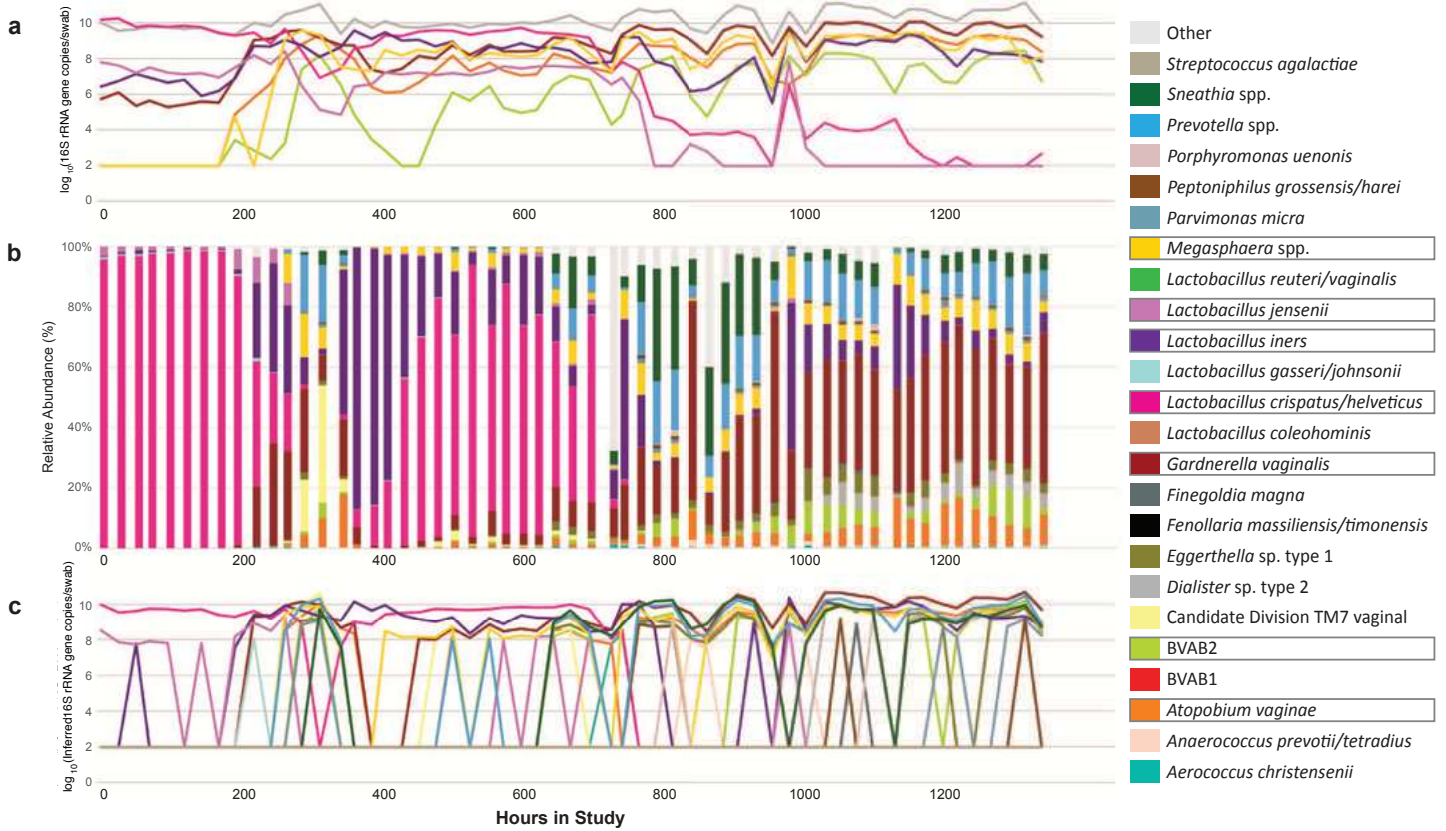

## Participant 08

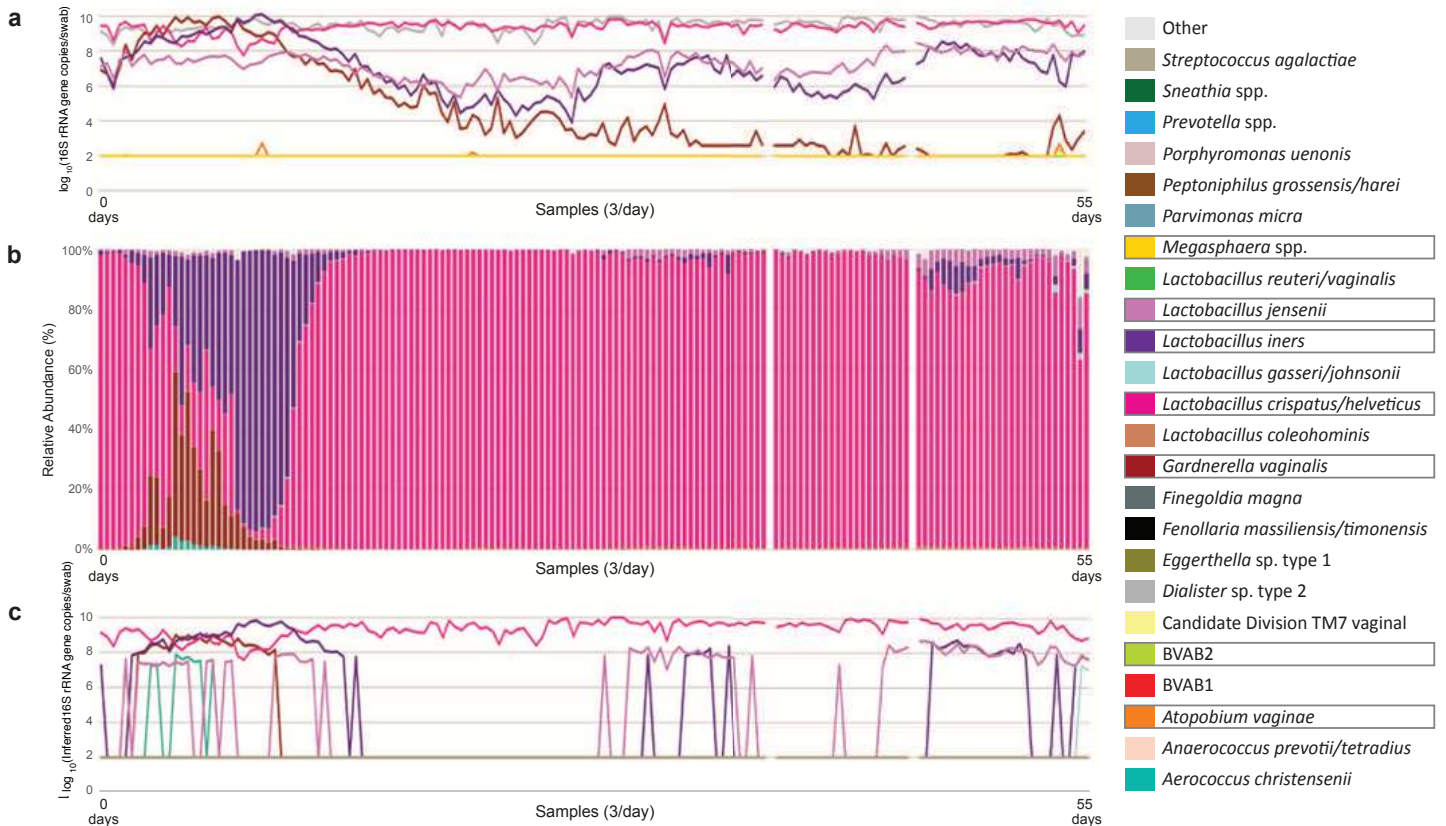

## Participant 09

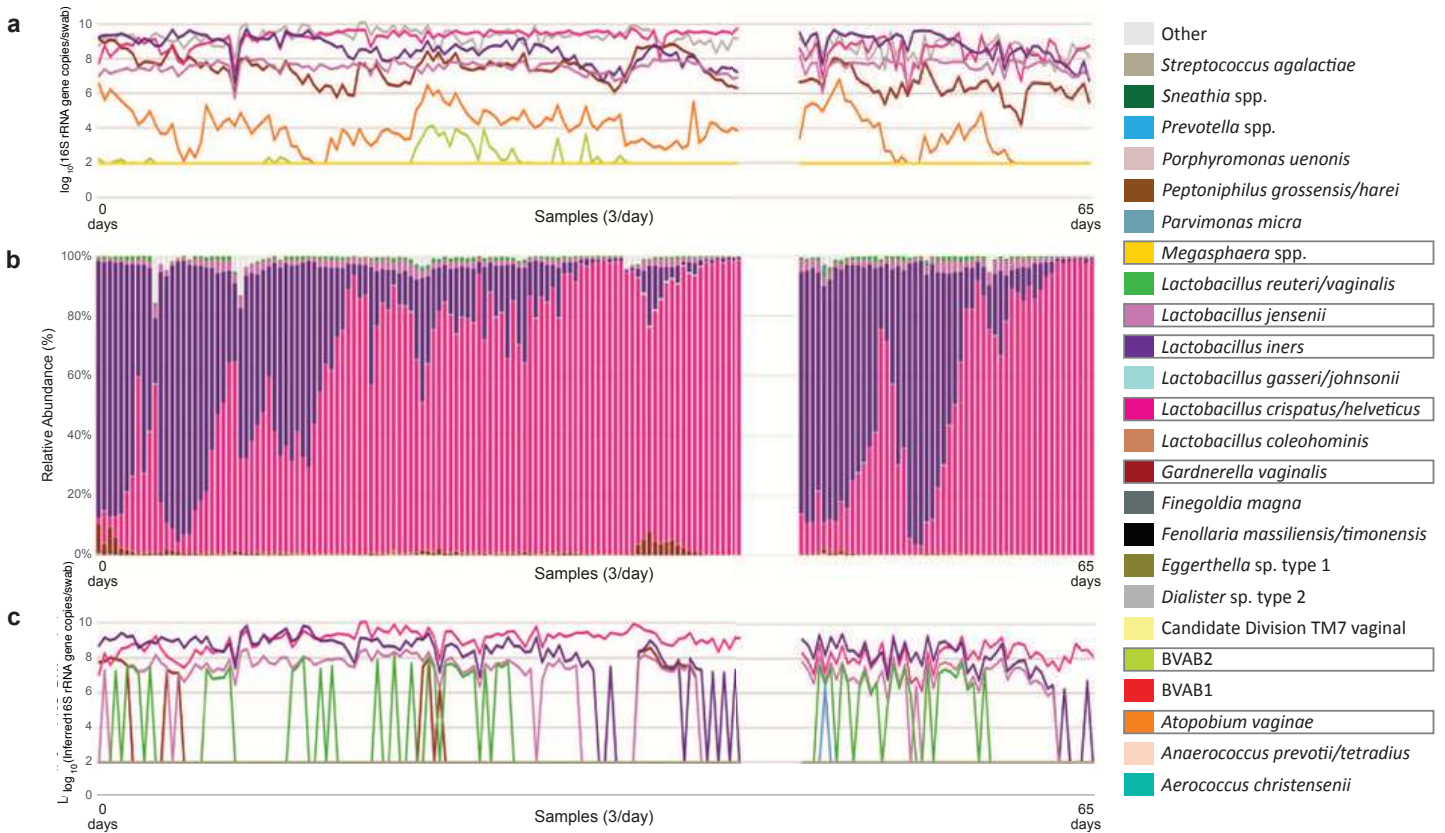

## Participant 10

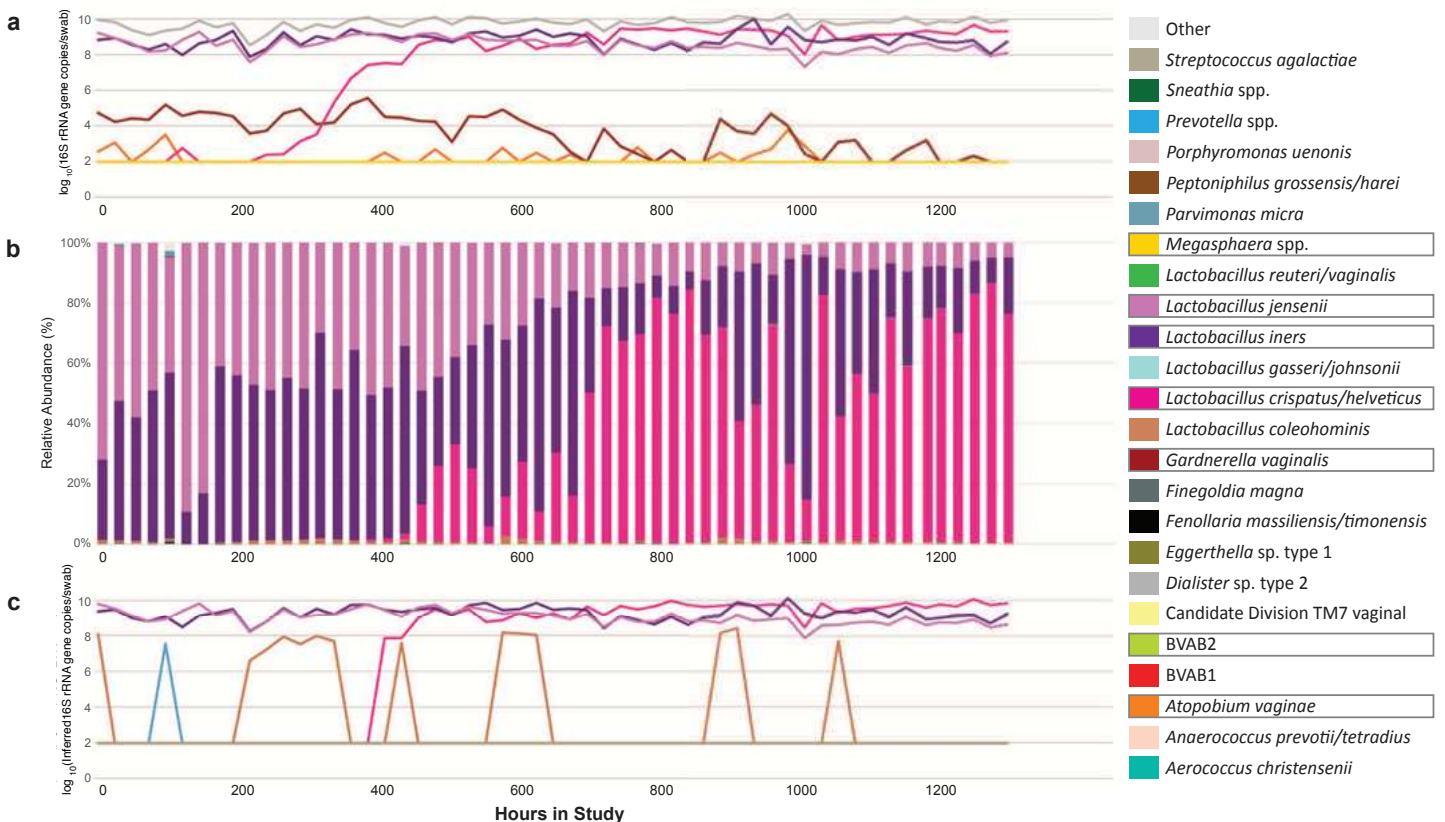

## Participant 11

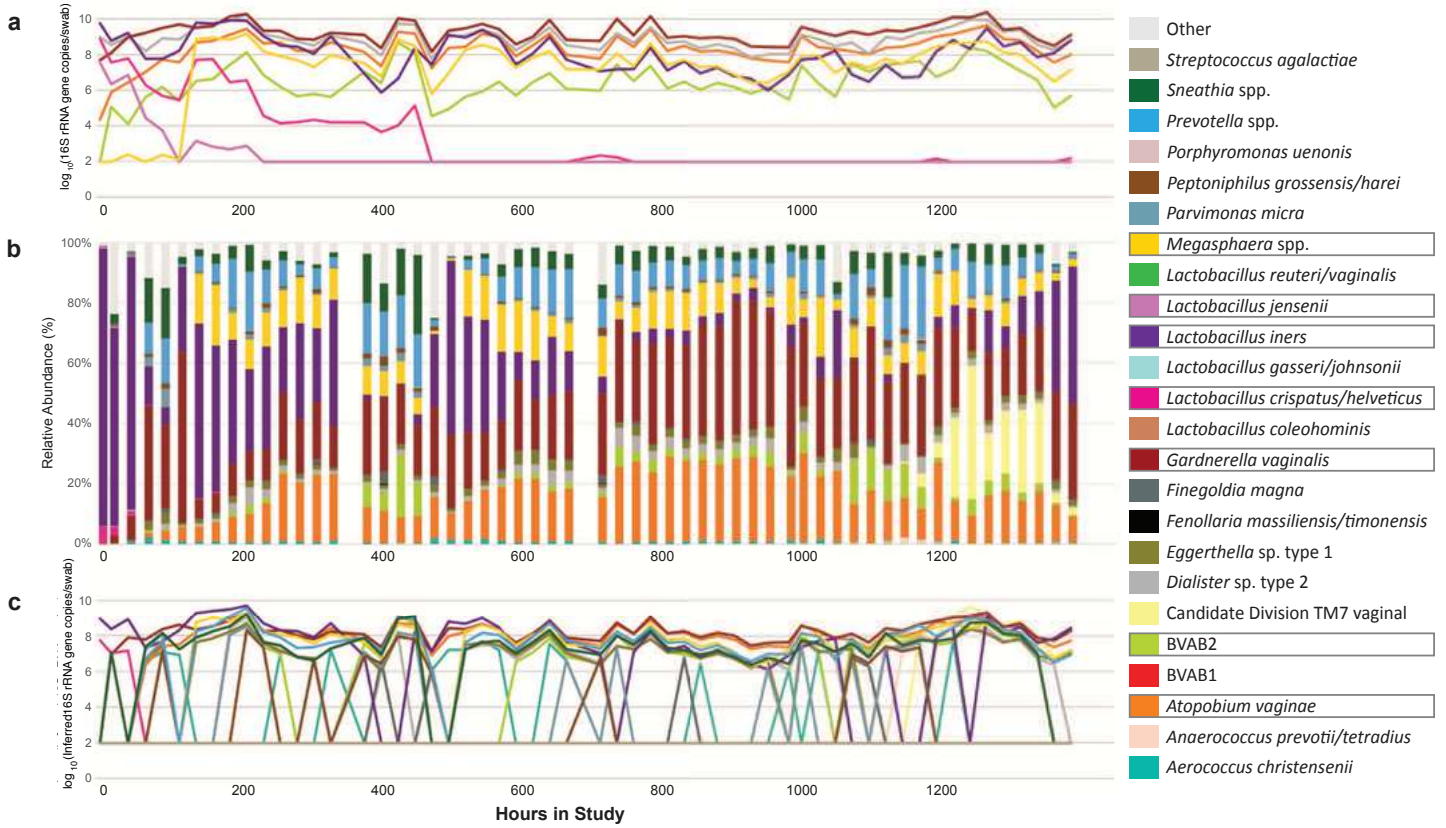

## Participant 12

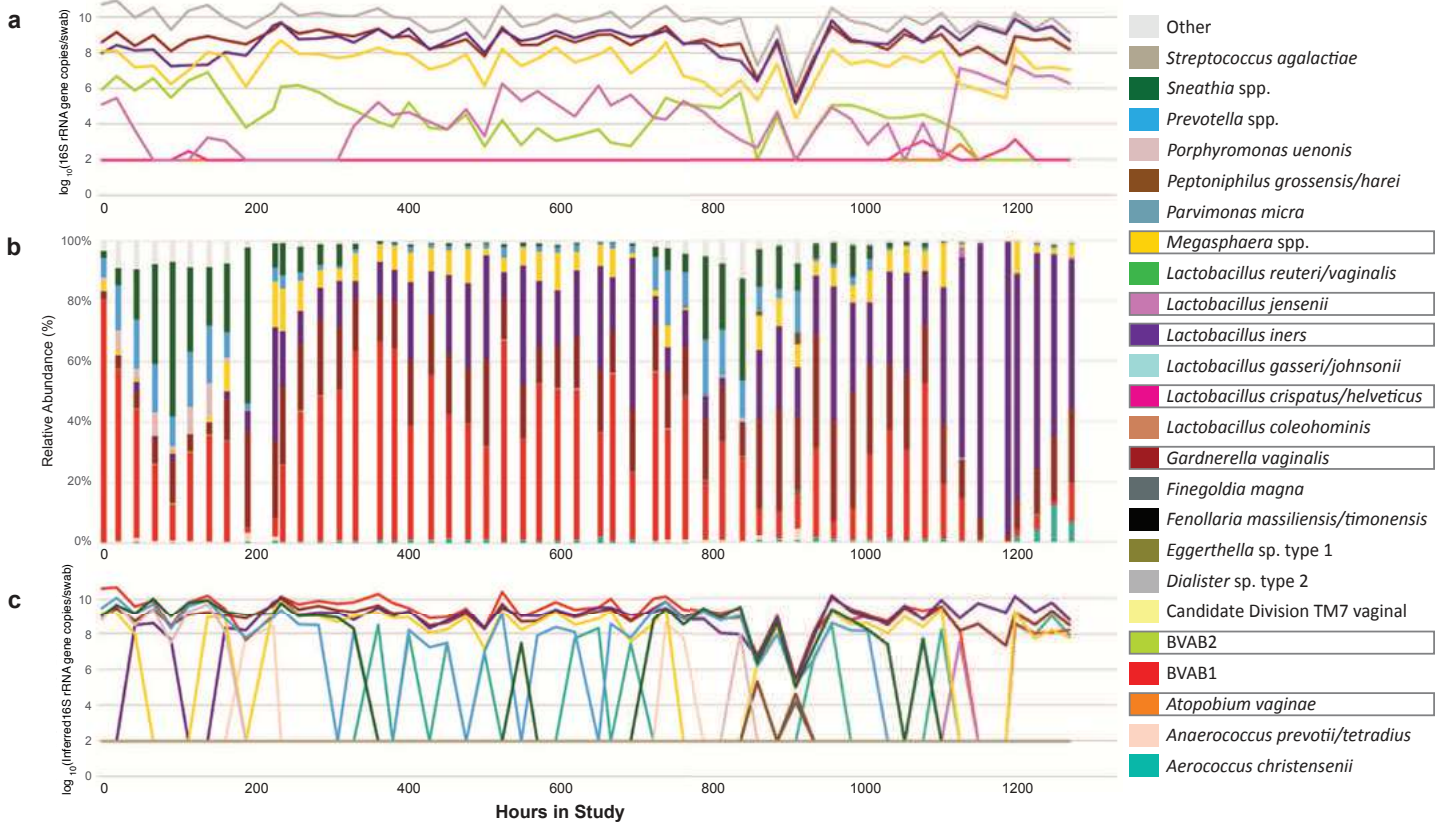

## Participant 13

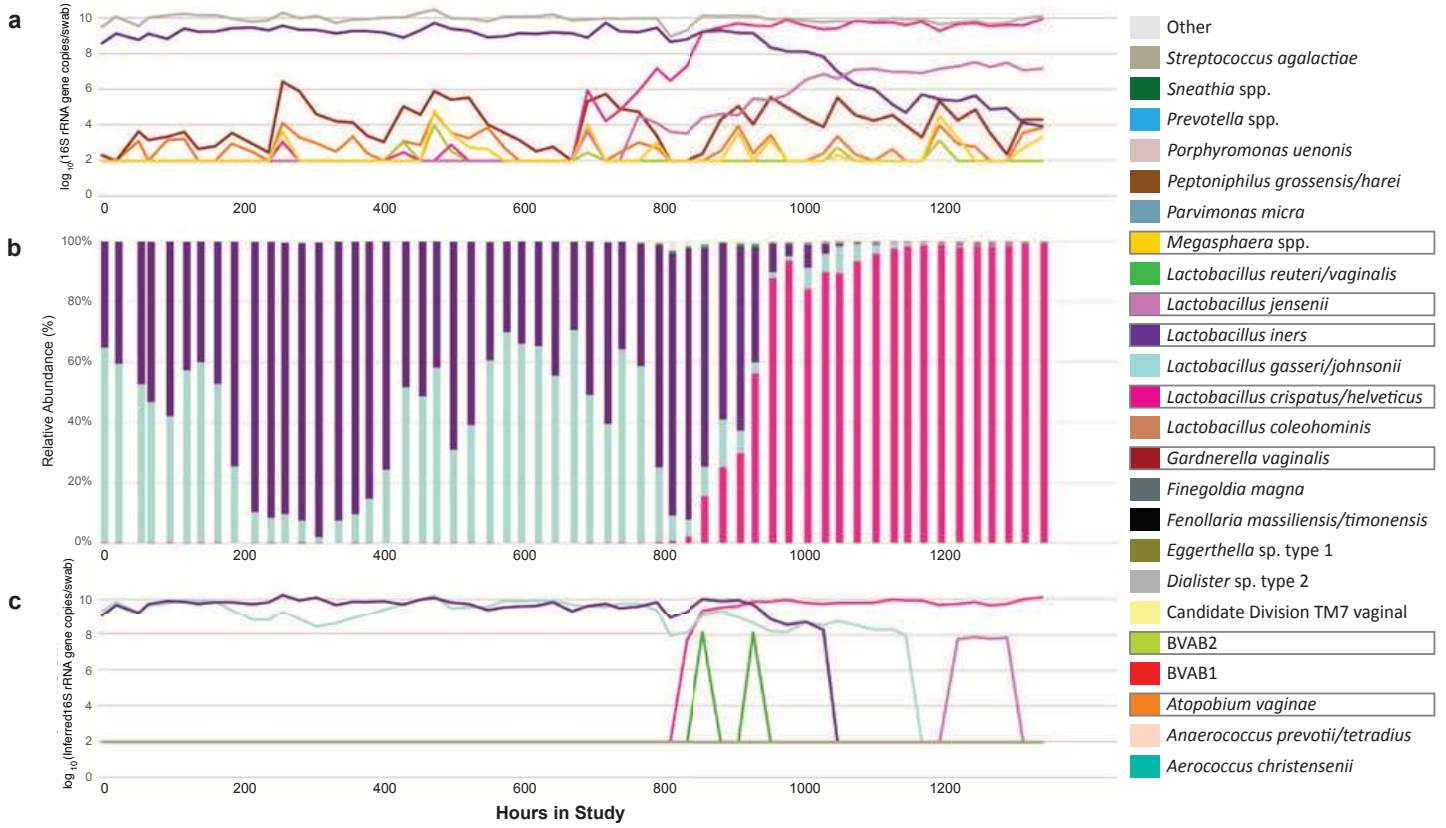

## Participant 14

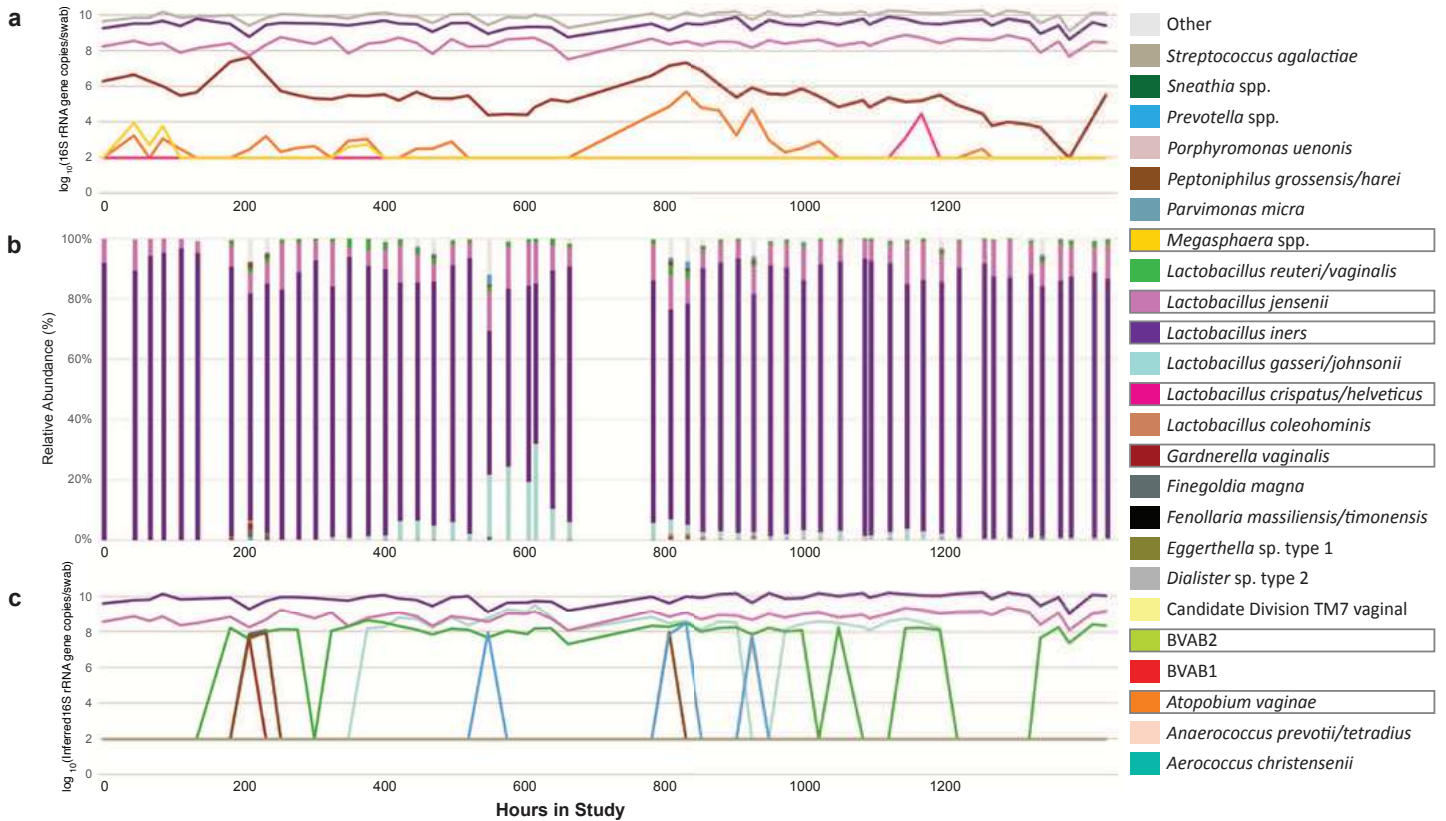

## Participant 15

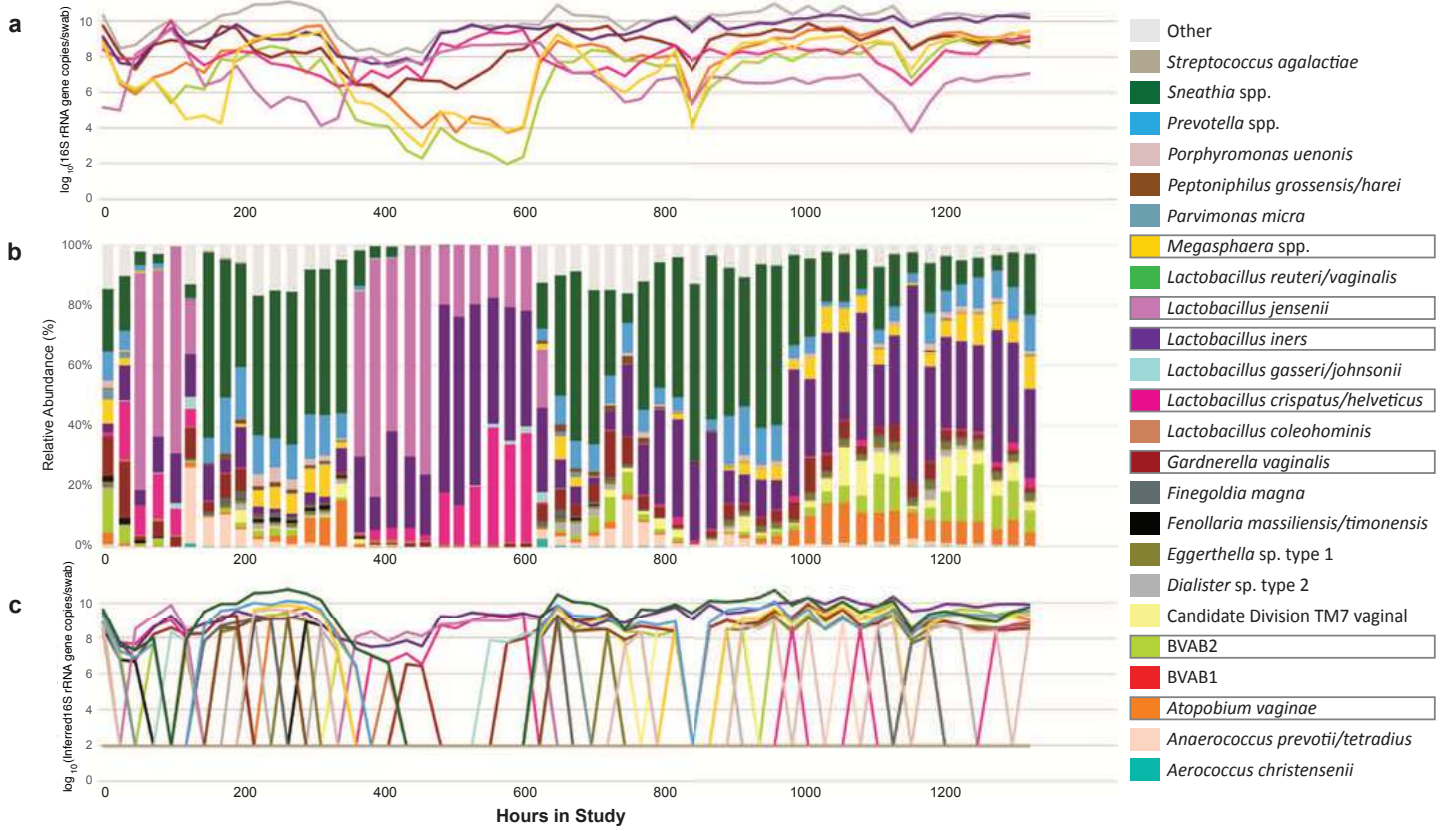

## Participant 16

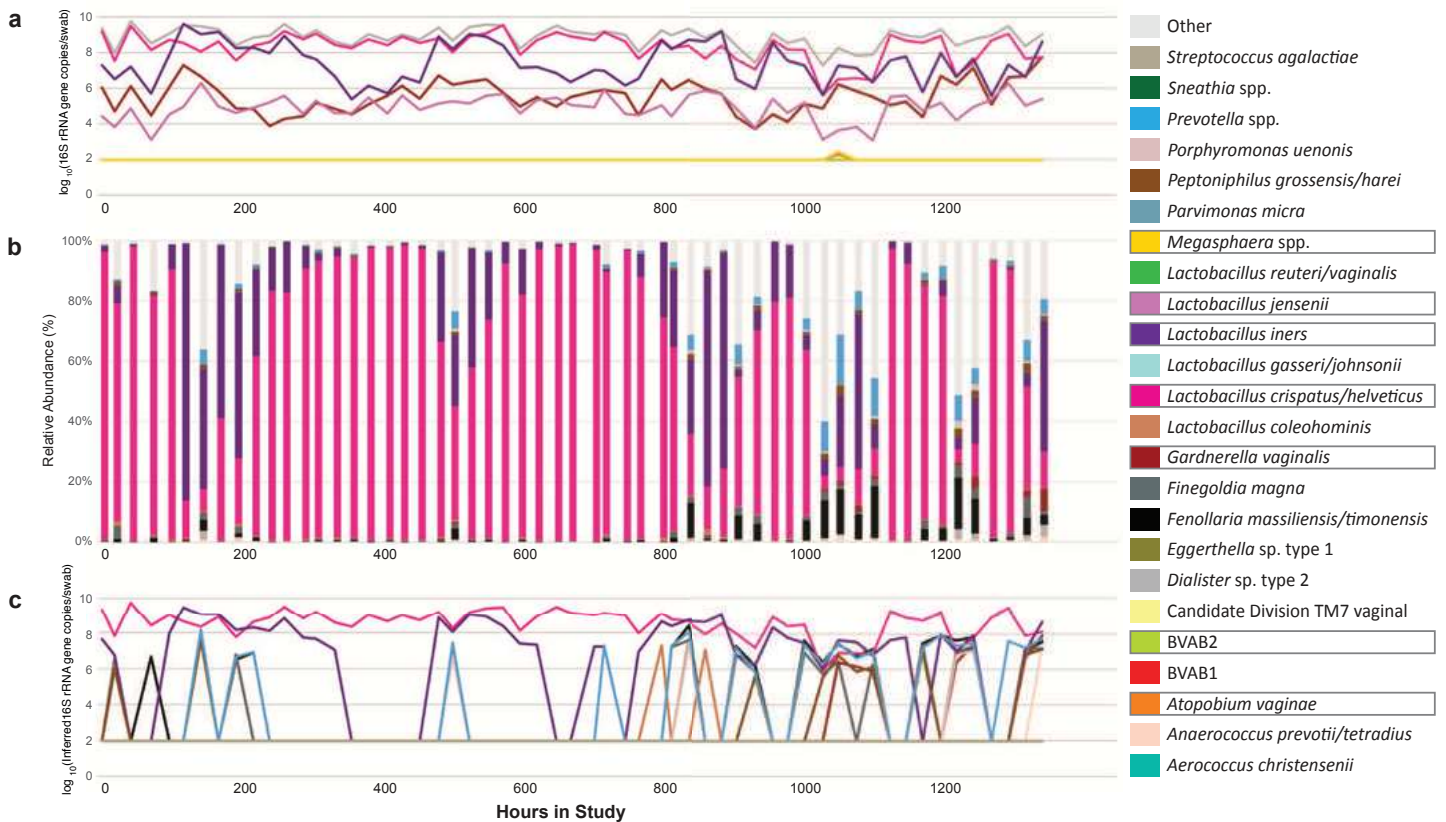



## Participant 17

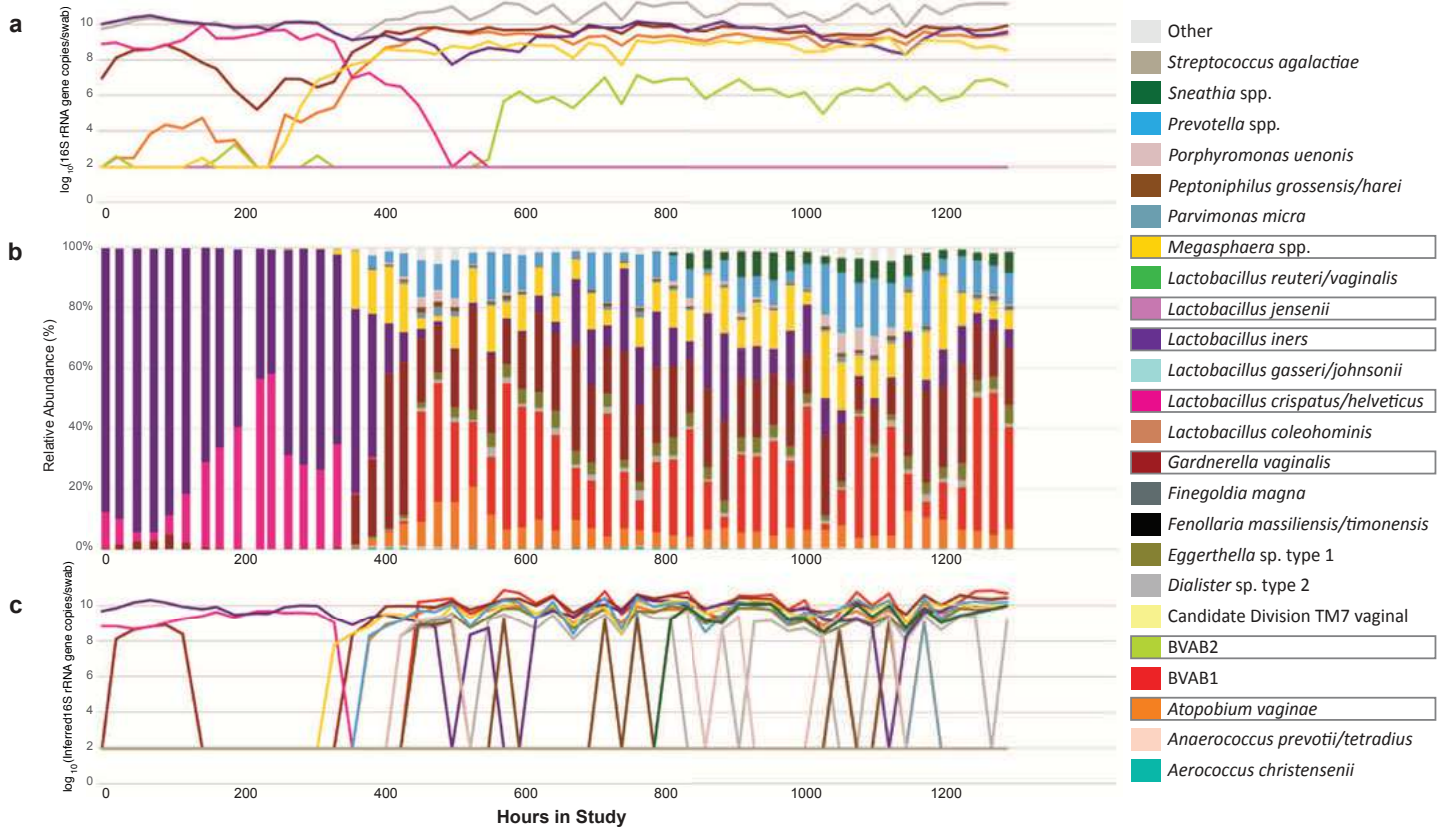

## Participant 18

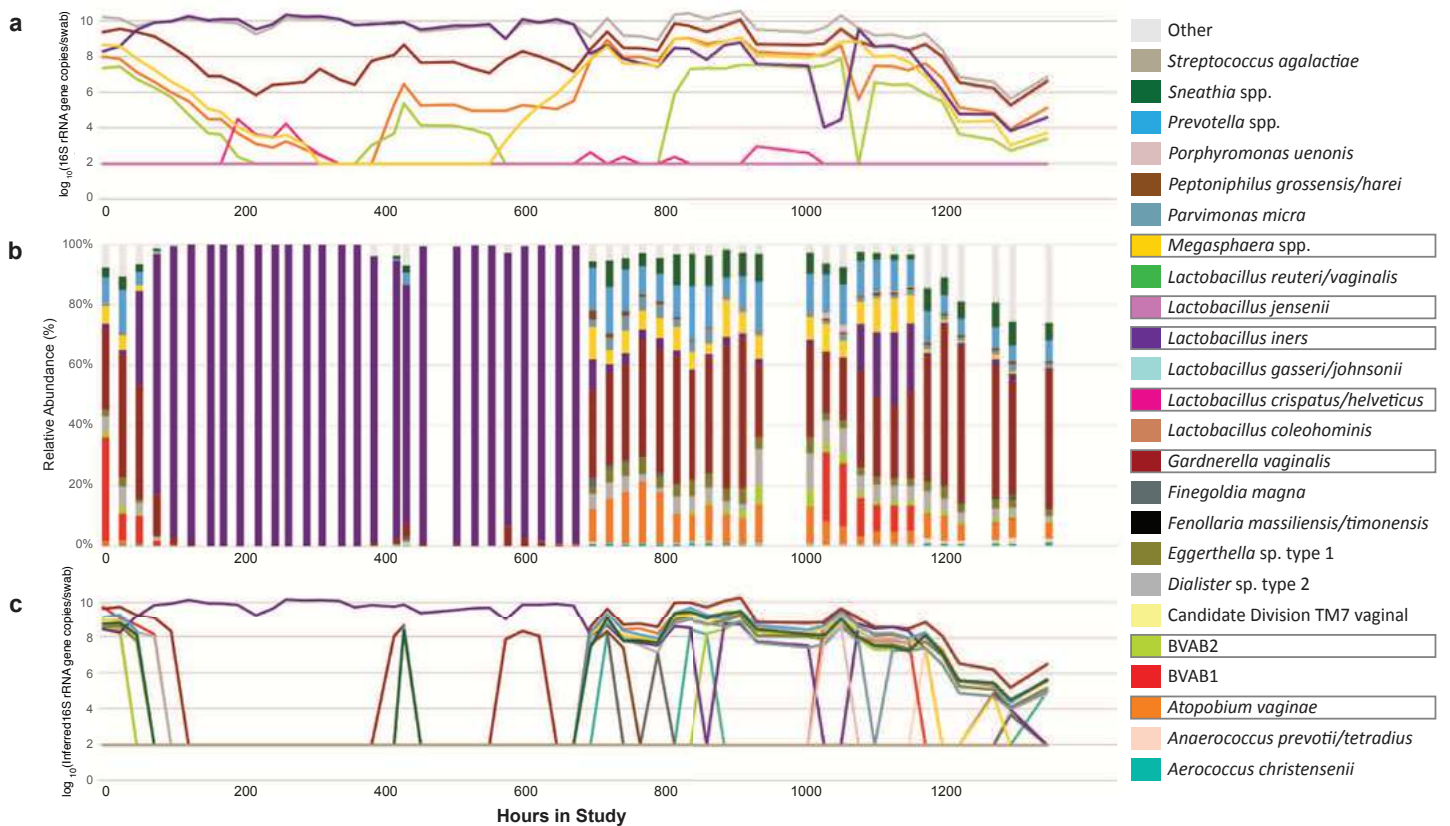

## Participant 19

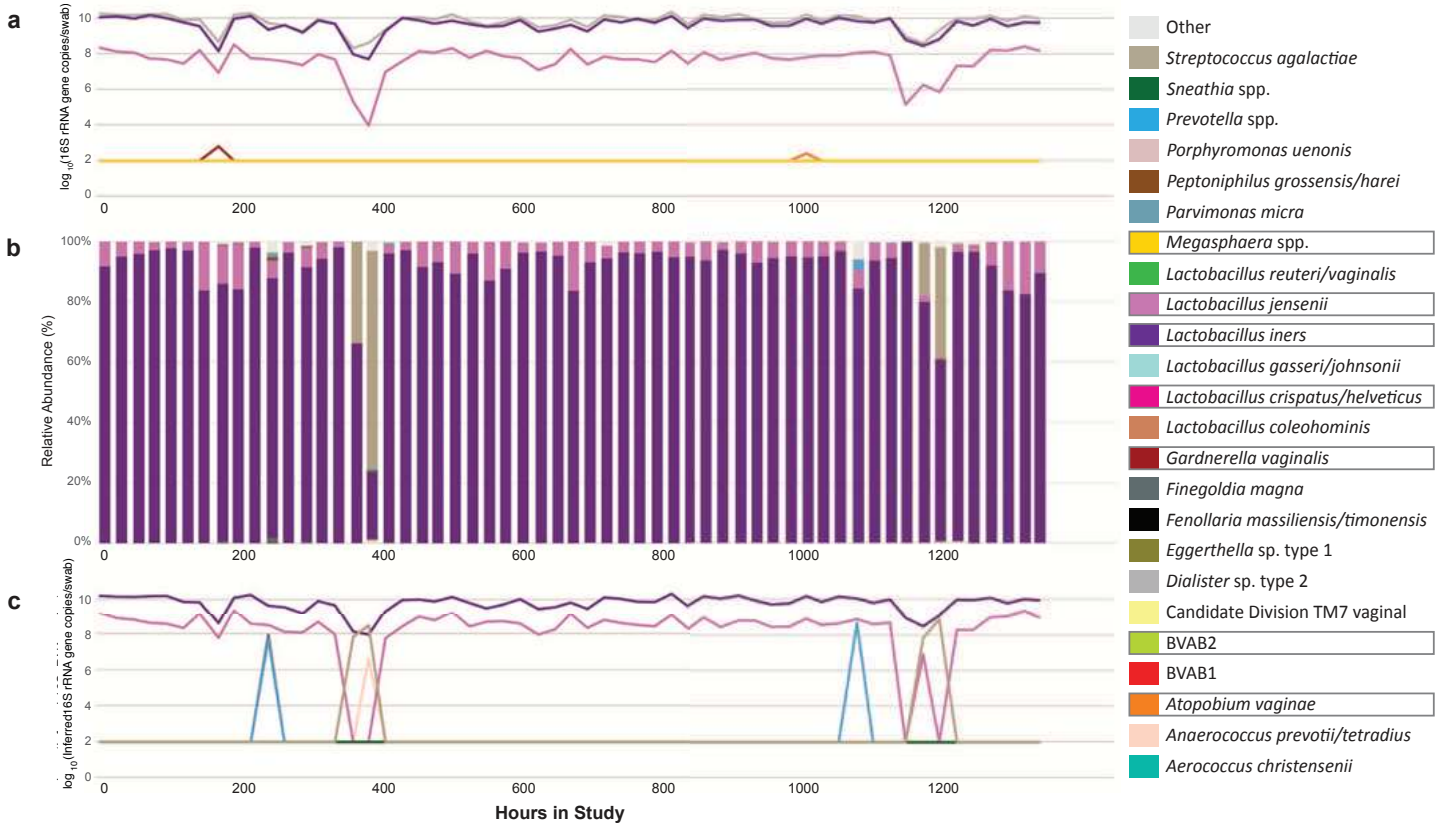

## Participant 20

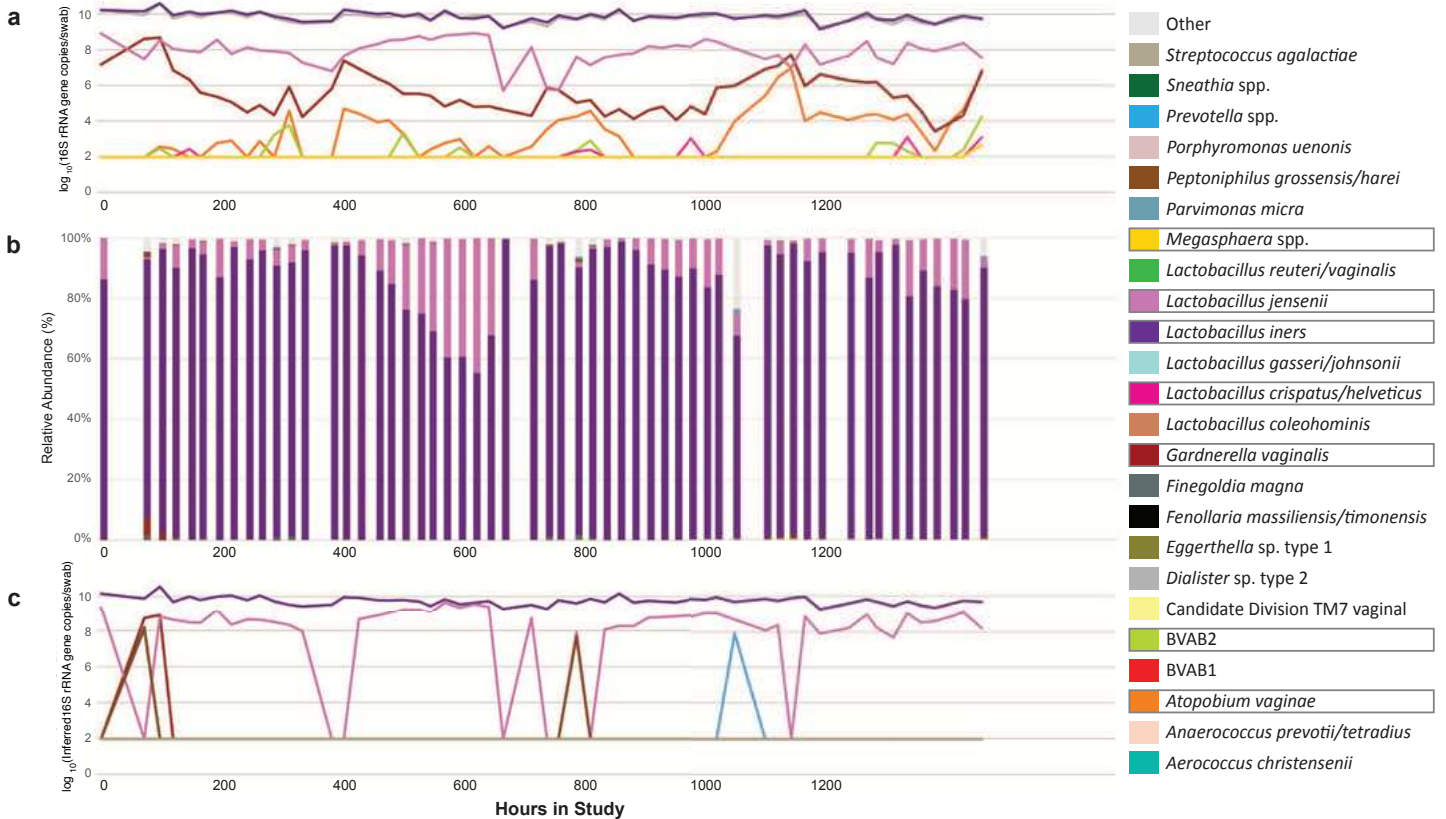

Supplement: mSystems.00777-19-sf001.pdf [file mSystems.00777-19-sf001.pdf]
