# Supplementary material for: Complementing 16S rRNA Gene Amplicon Sequencing with Total Bacterial Load To Infer Absolute Species Concentrations in the Vaginal Microbiome
Source: PubMed Central journal article supplement (PMC7141891; doi:10.1128/msystems.00777-19), 2020-04-07

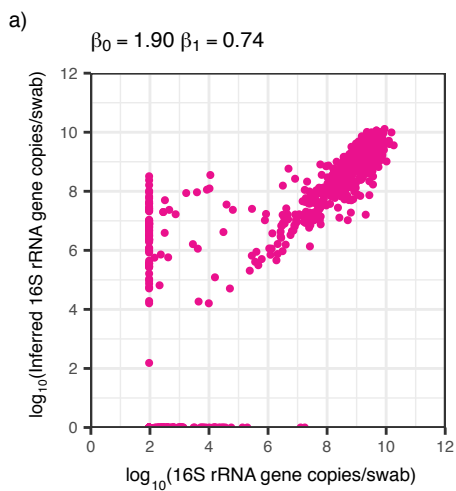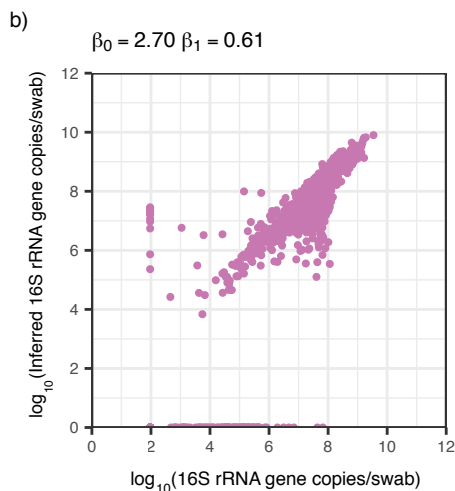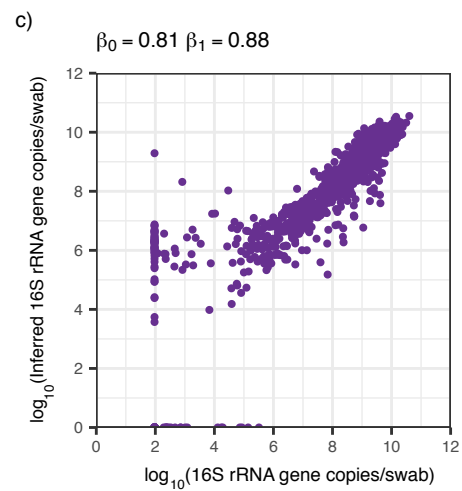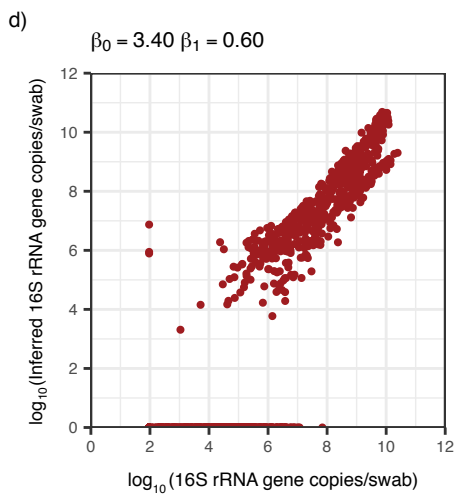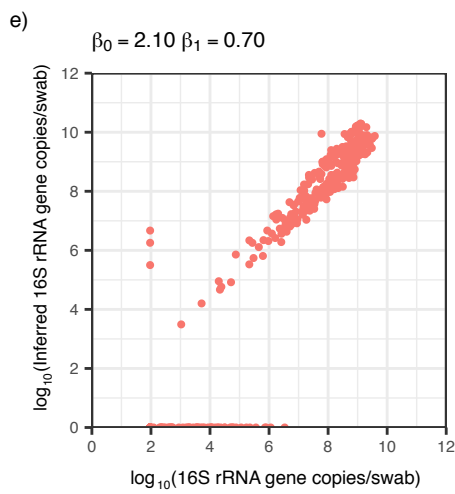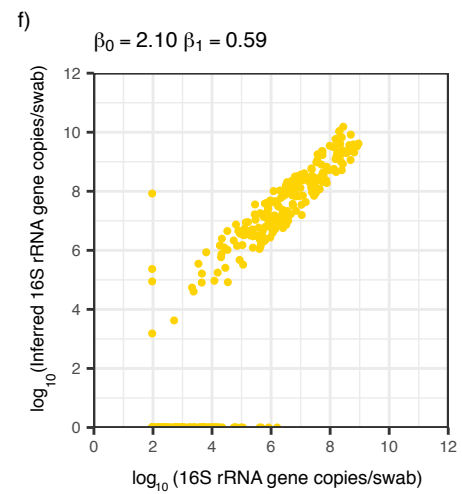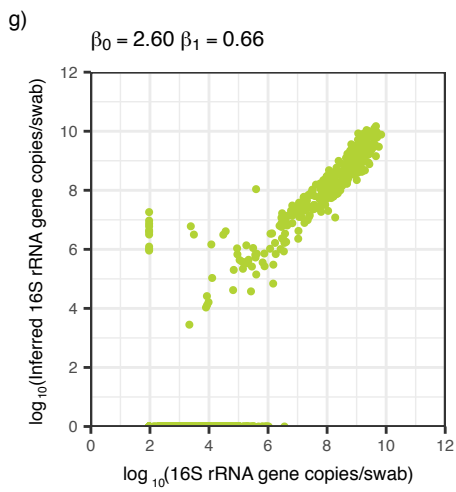

Supplement: mSystems.00777-19-sf004.pdf [file mSystems.00777-19-sf004.pdf]
